# Supplementary material
Source: MDPI journal article supplement (https://www.mdpi.com/1996-1073/14/20/6772)
Supplement: s1 [file s1]

# Mechanical Durability and Grindability of Pellets after Torrefaction Process

Arkadiusz Dyjakon <sup>1,\*</sup>, Tomasz Noszczyk <sup>1</sup> and Agata Mostek <sup>2</sup>

<sup>1</sup> Department of Applied Bioeconomy, Waste Biomass Valorization Group, the Wrocław University of Environmental and Life Sciences, 51-630 Wrocław, Poland; tomasz.noszczyk@upwr.edu.pl

<sup>2</sup> Faculty of Life Sciences and Technology, the Wrocław University of Environmental and Life Sciences, 51-630 Wrocław, Poland; 110838@student.upwr.edu.pl

\* Correspondence: arkadiusz.dyjakon@upwr.edu.pl; Tel.: +48-71-320-5945

Received: 25 August 2021; Accepted: 13 October 2021; Published: 17 October 2021

## Supplementary materials

**Table S1.** Proximate and ultimate analysis of the investigated raw and torrefied sunflower husk pellet.

| Parameter          |                         | Temperature   |               |               |
|--------------------|-------------------------|---------------|---------------|---------------|
|                    |                         | Untreated     | 200 °C        | 300 °C        |
| Proximate analysis | MC %                    | 1.07 ± 0.11   | 0.50 ± 0.06   | 0.92 ± 0.07   |
|                    | HHV MJ·kg <sup>-1</sup> | 19.80 ± 0.12  | 29.98 ± 0.21  | 29.81 ± 0.03  |
|                    | AC                      | 3.27 ± 0.12   | 8.10 ± 0.19   | 8.50 ± 0.06   |
|                    | VMC %                   | 77.82 ± 0.31  | 18.27 ± 0.60  | 18.93 ± 0.61  |
|                    | FCC                     | 17.84 ± 0.29  | 73.13 ± 0.53  | 71.65 ± 0.72  |
| Ultimate analysis  | C                       | 37.0 ± 7.0    | 74.0 ± 15.0   | 68.0 ± 14.0   |
|                    | H                       | 5.9 ± 1.2     | 3.4 ± 0.7     | 5.7 ± 1.1     |
|                    | N %                     | 1.5 ± 0.3     | 0.88 ± 0.18   | 1.0 ± 0.2     |
|                    | O                       | 52.0 ± 10.4   | 13.5 ± 2.7    | 16.7 ± 5.4    |
|                    | S                       | 0.131 ± 0.026 | 0.075 ± 0.015 | 0.101 ± 0.020 |

**Table S2.** Proximate and ultimate analysis of the investigated raw and torrefied beetroot pomace pellet.

| Parameter          |                         | Temperature  |              |              |
|--------------------|-------------------------|--------------|--------------|--------------|
|                    |                         | Untreated    | 200 °C       | 300 °C       |
| Proximate analysis | MC %                    | 1.03 ± 0.29  | 0.51 ± 0.09  | 0.96 ± 0.13  |
|                    | HHV MJ·kg <sup>-1</sup> | 17.55 ± 0.07 | 25.14 ± 0.18 | 26.08 ± 0.24 |
|                    | AC                      | 5.87 ± 0.08  | 13.54 ± 0.47 | 15.03 ± 0.09 |
|                    | VMC %                   | 77.96 ± 0.33 | 31.40 ± 0.25 | 26.33 ± 0.42 |
|                    | FCC                     | 15.15 ± 0.15 | 54.55 ± 0.26 | 57.67 ± 0.57 |
| Ultimate analysis  | C                       | 50.0 ± 12.0  | 62.0 ± 12.0  | 53.0 ± 11.0  |
|                    | H                       | 8.7 ± 1.7    | 4.1 ± 0.8    | 3.9 ± 0.8    |
|                    | N %                     | 1.3 ± 0.3    | 2.3 ± 0.5    | 1.5 ± 0.3    |
|                    | O                       | 24.7 ± 4.9   | 17.7 ± 3.5   | 27.0 ± 2.6   |

|   |               |               |               |
|---|---------------|---------------|---------------|
| S | 0.186 ± 0.037 | 0.288 ± 0.058 | 0.282 ± 0.056 |
|---|---------------|---------------|---------------|

**Table S3.** Proximate and ultimate analysis of the investigated raw and torrefied grass pellet.

| Parameter          |     |                     | Temperature   |               |               |
|--------------------|-----|---------------------|---------------|---------------|---------------|
|                    |     |                     | Untreated     | 200 °C        | 300 °C        |
| Proximate analysis | MC  | %                   | 1.16 ± 0.18   | 0.64 ± 0.12   | 0.61 ± 0.12   |
|                    | HHV | MJ·kg <sup>-1</sup> | 18.63 ± 0.11  | 25.23 ± 0.10  | 26.10 ± 0.16  |
|                    | AC  |                     | 6.76 ± 0.12   | 15.75 ± 0.17  | 17.32 ± 0.30  |
|                    | VMC | %                   | 76.91 ± 0.53  | 27.31 ± 0.72  | 22.60 ± 0.56  |
|                    | FCC |                     | 15.17 ± 0.58  | 56.30 ± 0.56  | 59.48 ± 0.73  |
| Ultimate analysis  | C   |                     | 46.0 ± 9.0    | 66.0 ± 13.0   | 68.0 ± 14.0   |
|                    | H   |                     | 7.0 ± 1.4     | 3.8 ± 0.8     | 2.0 ± 0.4     |
|                    | N   | %                   | 1.7 ± 0.3     | 1.8 ± 0.4     | 2.0 ± 0.4     |
|                    | O   |                     | 38.1 ± 7.6    | 12.6 ± 2.5    | 10.2 ± 2.0    |
|                    | S   |                     | 0.206 ± 0.041 | 0.258 ± 0.052 | 0.285 ± 0.057 |

**Table S4.** Proximate and ultimate analysis of the investigated raw and torrefied pine tree pellet.

| Parameter          |     |                     | Temperature   |               |               |
|--------------------|-----|---------------------|---------------|---------------|---------------|
|                    |     |                     | Untreated     | 200 °C        | 300 °C        |
| Proximate analysis | MC  | %                   | 0.81 ± 0.18   | 0.38 ± 0.08   | 0.47 ± 0.04   |
|                    | HHV | MJ·kg <sup>-1</sup> | 20.09 ± 0.02  | 29.02 ± 0.13  | 31.97 ± 0.05  |
|                    | AC  |                     | 1.06 ± 0.10   | 6.49 ± 0.26   | 2.54 ± 0.12   |
|                    | VMC | %                   | 81.98 ± 0.49  | 24.29 ± 0.33  | 15.53 ± 0.35  |
|                    | FCC |                     | 16.15 ± 0.56  | 68.85 ± 0.50  | 81.45 ± 0.40  |
| Ultimate analysis  | C   |                     | 49.0 ± 10.0   | 47.0 ± 9.0    | 82.0 ± 16.0   |
|                    | H   |                     | 7.3 ± 1.5     | 3.8 ± 0.8     | 2.1 ± 0.4     |
|                    | N   | %                   | 0.10 ± 0.02   | 0.50 ± 0.10   | 0.14 ± 0.03   |
|                    | O   |                     | 42.6 ± 8.5    | 42.9 ± 8.6    | 13.0 ± 2.6    |
|                    | S   |                     | 0.021 ± 0.004 | 0.085 ± 0.017 | 0.025 ± 0.005 |

**Table S5.** Proximate and ultimate analysis of the investigated raw and torrefied wheat straw pellet.

| Parameter          |     |                     | Temperature  |              |              |
|--------------------|-----|---------------------|--------------|--------------|--------------|
|                    |     |                     | Untreated    | 200 °C       | 300 °C       |
| Proximate analysis | MC  | %                   | 1.19 ± 0.12  | 0.37 ± 0.08  | 0.81 ± 0.04  |
|                    | HHV | MJ·kg <sup>-1</sup> | 18.09 ± 0.14 | 25.12 ± 0.13 | 25.25 ± 0.08 |
|                    | AC  |                     | 7.54 ± 0.02  | 19.41 ± 0.07 | 21.71 ± 0.09 |
|                    | VMC | %                   | 73.55 ± 0.17 | 21.39 ± 0.48 | 16.34 ± 1.55 |
|                    | FCC |                     | 17.71 ± 0.27 | 58.83 ± 0.47 | 61.14 ± 1.62 |
| Ultimate analysis  | C   |                     | 44.0 ± 9.0   | 58.0 ± 12.0  | 66.0 ± 13.0  |
|                    | H   | %                   | 6.8 ± 1.4    | 3.4 ± 0.7    | 1.6 ± 0.3    |
|                    | N   |                     | 0.80 ± 0.16  | 0.80 ± 0.16  | 0.89 ± 0.18  |

|  |   |                   |                   |                   |
|--|---|-------------------|-------------------|-------------------|
|  | O | $40.9 \pm 8.2$    | $19.1 \pm 3.8$    | $10.7 \pm 2.1$    |
|  | S | $0.089 \pm 0.018$ | $0.117 \pm 0.023$ | $0.095 \pm 0.019$ |
